# Supplementary material
Source: MDPI journal article supplement (https://www.mdpi.com/2410-3888/8/9/460)
Supplement: s1 [file s1]

# Selecting from the Fisheries Managers' Tool-Box: Recreational Fishers' Views of Stock Enhancement and Other Management Options

James R. Tweedley <sup>1,\*</sup>, Clara Obregón <sup>1,2</sup>, Sarah J. Beukes <sup>1</sup>, Neil R. Loneragan <sup>1</sup> and Michael Hughes <sup>1</sup>

<sup>1</sup> School of Environmental and Conservation Sciences and Harry Butler Institute, Murdoch University, 90 South Street, Murdoch, WA 6150, Australia

<sup>2</sup> Australian National Centre for Ocean Resources and Security (ANCORS), Faculty of Business and Law, University of Wollongong, Innovation Campus, Building 233 (ITAMS Building), Wollongong, NSW 2522, Australia

\* Correspondence: j.tweedley@murdoch.edu.au

**Supplementary Table S1:** Number of responses (*n*) and the frequency of occurrence (%) of responses about the demographics of Blue Swimmer Crabs and Black Bream fishers. Data obtained from respondents that answered all questions in the closed question online survey.

| Gender                                       | Blue Swimmer Crab |       | Black Bream |       |
|----------------------------------------------|-------------------|-------|-------------|-------|
|                                              | <i>n</i>          | %     | <i>n</i>    | %     |
| Male                                         | 298               | 83.94 | 99          | 93.40 |
| Female                                       | 55                | 15.49 | 7           | 6.60  |
| Other                                        | 2                 | 0.56  | 0           | 0.00  |
| Age                                          |                   |       |             |       |
|                                              | <i>n</i>          | %     | <i>n</i>    | %     |
| 18 - 24                                      | 30                | 8.47  | 18          | 16.98 |
| 25 - 34                                      | 66                | 18.64 | 26          | 24.53 |
| 35 - 44                                      | 96                | 27.12 | 29          | 27.36 |
| 45 - 54                                      | 70                | 19.77 | 15          | 14.15 |
| 55 - 64                                      | 53                | 14.97 | 16          | 15.09 |
| 65 or more                                   | 39                | 11.02 | 2           | 1.89  |
| Education                                    |                   |       |             |       |
|                                              | <i>n</i>          | %     | <i>n</i>    | %     |
| Primary School                               | 3                 | 0.88  | 1           | 0.94  |
| Secondary School                             | 108               | 31.67 | 41          | 38.68 |
| Technical or Further educational institution | 119               | 34.90 | 31          | 29.25 |
| University or other Tertiary institution     | 111               | 32.55 | 32          | 30.19 |
| Other                                        | 0                 | 0.00  | 1           | 0.94  |
| Household annual income                      |                   |       |             |       |
|                                              | <i>n</i>          | %     | <i>n</i>    | %     |
| <\$0                                         | 5                 | 1.61  | 3           | 3.06  |
| \$0                                          | 14                | 4.50  | 6           | 6.12  |
| \$1 - \$20,799                               | 20                | 6.43  | 9           | 9.18  |
| \$20,800 - \$41,599                          | 28                | 9.00  | 10          | 10.20 |
| \$41,600 - \$62,399                          | 48                | 15.43 | 10          | 10.20 |
| \$62,400 - \$83,199                          | 50                | 16.08 | 18          | 18.37 |
| \$84,000 - \$103,999                         | 32                | 10.29 | 16          | 16.33 |
| \$104,000 - \$142,999                        | 41                | 13.18 | 7           | 7.14  |
| \$143,000 - \$181,999                        | 32                | 10.29 | 6           | 6.12  |
| \$182,000 - \$233,999                        | 21                | 6.75  | 7           | 7.14  |
| \$234,000 - \$285,999                        | 5                 | 1.61  | 1           | 1.02  |
| \$286,000 - \$337,999                        | 6                 | 1.93  | 2           | 2.04  |
| > \$338,000                                  | 9                 | 2.89  | 3           | 3.06  |

**Supplementary Table S2:** Number of responses (*n*) and the frequency of occurrence (%) of responses about the characteristics of Blue Swimmer Crabs and Black Bream fishers. Data obtained from respondents that answered all questions in the closed question online survey.

| Fishing frequency                                  | Blue Swimmer Crab |       | Black Bream |       |
|----------------------------------------------------|-------------------|-------|-------------|-------|
|                                                    | <i>n</i>          | %     | <i>n</i>    | %     |
| I have never been fishing for crabs*               | 10                | 1.92  | 2           | 1.40  |
| I have not fished for crabs in the past 12 months* | 33                | 6.32  | 7           | 4.90  |
| Once                                               | 46                | 8.81  | 4           | 2.80  |
| Once a month                                       | 92                | 17.62 | 27          | 18.88 |
| Once every 2 - 3 months                            | 87                | 16.67 | 16          | 11.19 |
| Once every 4 - 6 months                            | 97                | 18.58 | 7           | 4.90  |
| 1 - 2 days a fortnight                             | 107               | 20.50 | 41          | 28.67 |
| 1 - 2 days a week                                  | 35                | 6.70  | 33          | 23.08 |
| 3 - 4 days a week                                  | 12                | 2.30  | 6           | 4.20  |
| 5 days or more a week                              | 3                 | 0.57  | 0           | 0.00  |

  

| Fishing experience | Blue Swimmer Crab |       | Black Bream |       |
|--------------------|-------------------|-------|-------------|-------|
|                    | <i>n</i>          | %     | <i>n</i>    | %     |
| 1 year or less     | 24                | 5.16  | 5           | 3.91  |
| 2 - 3 years        | 34                | 7.31  | 13          | 10.16 |
| 4 - 5 years        | 40                | 8.60  | 22          | 17.19 |
| 6 - 10 years       | 63                | 13.55 | 18          | 14.06 |
| 11 - 20 years      | 93                | 20.00 | 36          | 28.13 |
| 21 - 39 years      | 119               | 25.59 | 24          | 18.75 |
| 40 years or more   | 92                | 19.78 | 10          | 7.81  |

  

| Fishing location       | Blue Swimmer Crab |       | Black Bream |       |
|------------------------|-------------------|-------|-------------|-------|
|                        | <i>n</i>          | %     | <i>n</i>    | %     |
| Shore                  | 124               | 26.67 | 51          | 40.16 |
| Both but usually shore | 53                | 11.40 |             |       |
| Both equally           | 34                | 7.31  |             |       |
| Both but usually boat  | 83                | 17.85 |             |       |
| Kayak                  |                   |       | 31          | 24.41 |
| Boat                   | 171               | 36.77 | 38          | 29.92 |
| Other                  |                   |       | 7           | 5.51  |

  

| Fishing method                             | Blue Swimmer Crab |                | Black Bream |       |
|--------------------------------------------|-------------------|----------------|-------------|-------|
|                                            | <i>n</i>          | % <sup>^</sup> | <i>n</i>    | %     |
| Drop/crab nets                             | 372               | 79.49          |             |       |
| Scoop nets                                 | 276               | 58.97          |             |       |
| Catch by hand by diving/snorkelling/wading | 93                | 19.87          |             |       |
| Crab traps                                 | 3                 | 0.64           |             |       |
| Wire hook                                  | 5                 | 1.07           |             |       |
| Bait                                       |                   |                | 30          | 23.08 |
| Lures (including soft plastics)            |                   |                | 80          | 61.54 |
| Bait and lures                             |                   |                | 18          | 13.85 |
| Other                                      |                   |                | 2           | 1.54  |

  

| Skill level       | Blue Swimmer Crab |       | Black Bream |       |
|-------------------|-------------------|-------|-------------|-------|
|                   | <i>n</i>          | %     | <i>n</i>    | %     |
| Beginner (novice) | 57                | 12.28 | 13          | 10.16 |
| Intermediate      | 235               | 50.65 | 74          | 57.81 |
| Expert            | 172               | 37.07 | 41          | 32.03 |

\* After selecting this response these respondents were automatically transferred to the final page of the questionnaire to complete some basic demographic questions and received a thank you message.

<sup>^</sup> Respondents were able to select multiple options and so value do not sum to 100.

**Supplementary Table S3:** Percentage of recreational Blue Swimmer Crab fishers that agreed, disagreed or were unsure about the effects of potential issues on their chosen fishing location. Percentages given for all fishers overall and for those fishers utilising a particular location. Cells shaded according to the magnitude of their values with those in dark red being the lowest and those in dark green the highest. The CLUSTER-SIMPROF groups assigned are given below. Fishing locations with the same letter indicate no significant difference in the percentage contribution across the possible answers, whereas those with different letters are deemed to be different. Issues ranked by the percentage of respondents who agreed. Peel = Peel-Harvey Estuary; Swan = Swan-Canning Estuary; Lesch. = Leschenault Estuary; Shark = Shark Bay.

| Blue Swimmer Crabs                                                                 |         | Fishing location |      |      |        |       |
|------------------------------------------------------------------------------------|---------|------------------|------|------|--------|-------|
|                                                                                    | Overall |                  | Peel | Swan | Lesch. | Shark |
| <b>Taking of undersized crabs</b>                                                  |         |                  |      |      |        |       |
| Agree                                                                              | 75      |                  | 80   | 67   | 83     | 83    |
| Unsure                                                                             | 16      |                  | 12   | 19   | 14     | 17    |
| Disagree                                                                           | 9       |                  | 7    | 14   | 3      | 0     |
| CLUSTER-SIMPROF group                                                              |         |                  | b    | a    | c      | c     |
| <b>Overfishing of stocks</b>                                                       |         |                  |      |      |        |       |
| Agree                                                                              | 68      |                  | 72   | 69   | 62     | 100   |
| Unsure                                                                             | 20      |                  | 17   | 19   | 34     | 0     |
| Disagree                                                                           | 12      |                  | 11   | 12   | 3      | 0     |
| CLUSTER-SIMPROF group                                                              |         |                  | a    | a    | b      | c     |
| <b>Exceeding the bag limit</b>                                                     |         |                  |      |      |        |       |
| Agree                                                                              | 68      |                  | 71   | 65   | 72     | 33    |
| Unsure                                                                             | 22      |                  | 19   | 21   | 24     | 67    |
| Disagree                                                                           | 10      |                  | 9    | 15   | 3      | 0     |
| CLUSTER-SIMPROF group                                                              |         |                  | a    | a    | a      | b     |
| <b>Recreational fishing</b>                                                        |         |                  |      |      |        |       |
| Agree                                                                              | 62      |                  | 64   | 62   | 55     | 67    |
| Unsure                                                                             | 27      |                  | 25   | 25   | 34     | 33    |
| Disagree                                                                           | 11      |                  | 11   | 13   | 10     | 0     |
| CLUSTER-SIMPROF group                                                              |         |                  | a    | a    | a      | b     |
| <b>Commercial fishing</b>                                                          |         |                  |      |      |        |       |
| Agree                                                                              | 59      |                  | 62   | 59   | 55     | 67    |
| Unsure                                                                             | 32      |                  | 30   | 30   | 41     | 17    |
| Disagree                                                                           | 9       |                  | 8    | 11   | 3      | 17    |
| CLUSTER-SIMPROF group                                                              |         |                  | a    | a    | b      | c     |
| <b>Lack of education</b>                                                           |         |                  |      |      |        |       |
| Agree                                                                              | 47      |                  | 49   | 52   | 38     | 67    |
| Unsure                                                                             | 18      |                  | 15   | 15   | 31     | 17    |
| Disagree                                                                           | 35      |                  | 36   | 33   | 31     | 17    |
| CLUSTER-SIMPROF group                                                              |         |                  | a    | a    | b      | c     |
| <b>The closed season is too short</b>                                              |         |                  |      |      |        |       |
| Agree                                                                              | 42      |                  | 47   | 36   | 38     | 67    |
| Unsure                                                                             | 25      |                  | 24   | 27   | 34     | 17    |
| Disagree                                                                           | 33      |                  | 30   | 38   | 28     | 17    |
| CLUSTER-SIMPROF group                                                              |         |                  | a    | a    | a      | b     |
| <b>Recreational fishing pressure is irrelevant compared to commercial pressure</b> |         |                  |      |      |        |       |
| Agree                                                                              | 25      |                  | 24   | 27   | 21     | 33    |
| Unsure                                                                             | 38      |                  | 39   | 32   | 48     | 33    |
| Disagree                                                                           | 37      |                  | 37   | 41   | 31     | 33    |
| CLUSTER-SIMPROF group                                                              |         |                  | a    | a    | a      | a     |
| <b>Pollution</b>                                                                   |         |                  |      |      |        |       |
| Agree                                                                              | 23      |                  | 20   | 27   | 36     | 0     |
| Unsure                                                                             | 44      |                  | 41   | 42   | 43     | 50    |
| Disagree                                                                           | 33      |                  | 38   | 31   | 21     | 50    |
| CLUSTER-SIMPROF group                                                              |         |                  | a    | a    | b      | c     |
| <b>Climate change</b>                                                              |         |                  |      |      |        |       |
| Agree                                                                              | 23      |                  | 21   | 26   | 24     | 67    |
| Unsure                                                                             | 53      |                  | 55   | 49   | 52     | 0     |
| Disagree                                                                           | 24      |                  | 24   | 25   | 24     | 33    |
| CLUSTER-SIMPROF group                                                              |         |                  | a    | a    | a      | b     |
| <b>There are no issues affecting the fishery</b>                                   |         |                  |      |      |        |       |
| Agree                                                                              | 2       |                  | 2    | 2    | 3      | 0     |
| Unsure                                                                             | 10      |                  | 9    | 10   | 17     | 0     |
| Disagree                                                                           | 88      |                  | 89   | 88   | 79     | 100   |
| CLUSTER-SIMPROF group                                                              |         |                  | a    | a    | a      | a     |

**Supplementary Table S4:** Percentage of recreational Black Bream fishers that agreed, disagreed or were unsure about the effects of potential issues on their chosen fishing location. Percentages given for all fishers overall and for those fishers utilising a particular location. Cells shaded according to the magnitude of their values with those in dark red being the lowest and those in dark green the highest. The CLUSTER-SIMPROF groups assigned are given below. Fishing locations with the same letter indicate no significant difference in the percentage contribution across the possible answers, whereas those with different letters are deemed to be different. Issues ranked by the percentage of respondents who agreed. Black = Blackwood River Estuary; Peel = Peel-Harvey Estuary; Swan = Swan-Canning Estuary; Wilson = Wilson Inlet. Other = other estuaries, i.e. not one of the system named, e.g. Beaufort Inlet or Stokes Inlet.

| Black Bream                               |         |  | Fishing location |      |      |        |       |
|-------------------------------------------|---------|--|------------------|------|------|--------|-------|
|                                           | Overall |  | Black.           | Peel | Swan | Wilson | Other |
| Taking of undersized fish                 |         |  |                  |      |      |        |       |
| Agree                                     | 70      |  | 31               | 79   | 86   | 100    | 46    |
| Unsure                                    | 23      |  | 46               | 14   | 12   | 0      | 43    |
| Disagree                                  | 7       |  | 23               | 7    | 2    | 0      | 11    |
| CLUSTER-SIMPROF group                     |         |  | b                | a    | a    |        | b     |
| Lack of education                         |         |  |                  |      |      |        |       |
| Agree                                     | 67      |  | 54               | 79   | 71   | 0      | 61    |
| Unsure                                    | 20      |  | 31               | 21   | 15   | 100    | 21    |
| Disagree                                  | 13      |  | 15               | 0    | 14   | 0      | 18    |
| CLUSTER-SIMPROF group                     |         |  | a                | a    | a    |        | a     |
| Fishing pressure and overfishing          |         |  |                  |      |      |        |       |
| Agree                                     | 66      |  | 69               | 77   | 73   | 0      | 46    |
| Unsure                                    | 19      |  | 23               | 15   | 17   | 100    | 21    |
| Disagree                                  | 15      |  | 8                | 8    | 10   | 0      | 32    |
| CLUSTER-SIMPROF group                     |         |  | a                | a    | a    |        | b     |
| Exceeding the bag limit                   |         |  |                  |      |      |        |       |
| Agree                                     | 57      |  | 46               | 64   | 66   | 100    | 39    |
| Unsure                                    | 33      |  | 38               | 36   | 29   | 0      | 39    |
| Disagree                                  | 10      |  | 15               | 0    | 5    | 0      | 21    |
| CLUSTER-SIMPROF group                     |         |  | a                | a    | b    |        | c     |
| Pollution                                 |         |  |                  |      |      |        |       |
| Agree                                     | 49      |  | 31               | 71   | 51   | 0      | 43    |
| Unsure                                    | 29      |  | 31               | 14   | 36   | 100    | 18    |
| Disagree                                  | 23      |  | 38               | 14   | 14   | 0      | 39    |
| CLUSTER-SIMPROF group                     |         |  | b                | a    | a    |        | b     |
| Commercial fishing                        |         |  |                  |      |      |        |       |
| Agree                                     | 46      |  | 69               | 71   | 44   | 0      | 29    |
| Unsure                                    | 39      |  | 23               | 14   | 46   | 0      | 46    |
| Disagree                                  | 15      |  | 8                | 14   | 10   | 100    | 25    |
| CLUSTER-SIMPROF group                     |         |  | a                | a    | b    |        | b     |
| Poor management                           |         |  |                  |      |      |        |       |
| Agree                                     | 43      |  | 62               | 64   | 44   | 0      | 25    |
| Unsure                                    | 13      |  | 8                | 7    | 15   | 0      | 14    |
| Disagree                                  | 43      |  | 31               | 29   | 41   | 100    | 61    |
| CLUSTER-SIMPROF group                     |         |  | a                | a    | a    |        |       |
| Recreational fishing                      |         |  |                  |      |      |        |       |
| Agree                                     | 43      |  | 23               | 43   | 47   | 0      | 43    |
| Unsure                                    | 28      |  | 23               | 50   | 25   | 0      | 25    |
| Disagree                                  | 30      |  | 54               | 7    | 27   | 100    | 32    |
| CLUSTER-SIMPROF group                     |         |  | a                | a    | a    |        | a     |
| Climate change                            |         |  |                  |      |      |        |       |
| Agree                                     | 19      |  | 31               | 14   | 19   | 0      | 18    |
| Unsure                                    | 56      |  | 46               | 57   | 58   | 100    | 54    |
| Disagree                                  | 25      |  | 23               | 29   | 24   | 0      | 29    |
| CLUSTER-SIMPROF group                     |         |  | a                | b    | b    |        | b     |
| There are no issues affecting the fishery |         |  |                  |      |      |        |       |
| Agree                                     | 3       |  | 0                | 0    | 0    | 0      | 11    |
| Unsure                                    | 12      |  | 23               | 7    | 10   | 0      | 14    |
| Disagree                                  | 85      |  | 77               | 93   | 90   | 100    | 75    |
| CLUSTER-SIMPROF group                     |         |  | a                | a    | a    |        | a     |

**Supplementary Table S5:** Percentage of recreational Blue Swimmer Crab fishers that considered that measures of their catches and fishing trips had changed. Percentages given for all fishers overall and for those fishers utilising a particular fishing location. Cells shaded according to the magnitude of their values with those in dark red being the lowest and those in dark green the highest. The CLUSTER-SIMPROF groups assigned are given below. Fishing locations with the same letter indicate no significant difference in the percentage contribution across the possible answers, whereas those with different letters are deemed to be different.

| Blue Swimmer Crabs                       |         | Fishing location |      |      |        |       |
|------------------------------------------|---------|------------------|------|------|--------|-------|
|                                          | Overall |                  | Peel | Swan | Lesch. | Shark |
| <b>Crab size</b>                         |         |                  |      |      |        |       |
| Increased                                | 5       |                  | 5    | 5    | 10     | 0     |
| Not changed                              | 39      |                  | 38   | 42   | 20     | 0     |
| Decreased                                | 56      |                  | 57   | 53   | 70     | 100   |
| CLUSTER-SIMPROF group                    |         |                  | a    | a    | b      | c     |
| <b>Crab abundance</b>                    |         |                  |      |      |        |       |
| Increased                                | 6       |                  | 7    | 4    | 10     | 0     |
| Not changed                              | 25      |                  | 23   | 27   | 10     | 17    |
| Decreased                                | 69      |                  | 70   | 69   | 80     | 83    |
| CLUSTER-SIMPROF group                    |         |                  | a    | a    | a      | a     |
| <b>Abundance of other species caught</b> |         |                  |      |      |        |       |
| Increased                                | 10      |                  | 7    | 11   | 10     | 0     |
| Not changed                              | 56      |                  | 60   | 52   | 50     | 67    |
| Decreased                                | 34      |                  | 34   | 37   | 40     | 33    |
| CLUSTER-SIMPROF group                    |         |                  | a    | b    | b      | a     |
| <b>Number of people fishing</b>          |         |                  |      |      |        |       |
| Increased                                | 81      |                  | 84   | 82   | 90     | 83    |
| Not changed                              | 17      |                  | 15   | 16   | 5      | 17    |
| Decreased                                | 2       |                  | 1    | 2    | 5      | 0     |
| CLUSTER-SIMPROF group                    |         |                  | a    | a    | b      | a     |
| <b>Number of sites I fish regularly</b>  |         |                  |      |      |        |       |
| Increased                                | 18      |                  | 19   | 23   | 15     | 0     |
| Not changed                              | 56      |                  | 54   | 51   | 60     | 67    |
| Decreased                                | 26      |                  | 27   | 25   | 25     | 33    |
| CLUSTER-SIMPROF group                    |         |                  | a    | a    | a      | b     |
| <b>Fishing depth</b>                     |         |                  |      |      |        |       |
| Increased                                | 23      |                  | 22   | 26   | 15     | 33    |
| Not changed                              | 75      |                  | 75   | 72   | 80     | 67    |
| Decreased                                | 3       |                  | 3    | 2    | 5      | 0     |
| CLUSTER-SIMPROF group                    |         |                  | a    | a    | b      | c     |
| <b>Time spent fishing</b>                |         |                  |      |      |        |       |
| Increased                                | 59      |                  | 62   | 60   | 75     | 100   |
| Not changed                              | 30      |                  | 28   | 27   | 25     | 0     |
| Decreased                                | 11      |                  | 10   | 13   | 0      | 0     |
| CLUSTER-SIMPROF group                    |         |                  | a    | a    | b      | c     |
| <b>Distance travelled</b>                |         |                  |      |      |        |       |
| Increased                                | 40      |                  | 44   | 38   | 50     | 33    |
| Not changed                              | 58      |                  | 56   | 59   | 50     | 67    |
| Decreased                                | 2       |                  | 0    | 3    | 0      | 0     |
| CLUSTER-SIMPROF group                    |         |                  | a    | a    | a      | a     |

**Supplementary Table S6:** Percentage of recreational Black Bream fishers that considered that measures of their catches and fishing trips had changed. Percentages given for all fishers overall and for those fishers utilising a particular fishing location. Cells shaded according to the magnitude of their values with those in dark red being the lowest and those in dark green the highest. The CLUSTER-SIMPROF groups assigned are given below. Fishing locations with the same letter indicate no significant difference in the percentage contribution across the possible answers, whereas those with different letters are deemed to be different.

| Black Bream                              |         | Fishing location |        |      |      |        |       |
|------------------------------------------|---------|------------------|--------|------|------|--------|-------|
|                                          | Overall |                  | Black. | Peel | Swan | Wilson | Other |
| <b>Black Bream size</b>                  |         |                  |        |      |      |        |       |
| Increased                                | 5       |                  | 13     | 3    | 0    | 0      | 5     |
| Not changed                              | 35      |                  | 6      | 60   | 14   | 100    | 33    |
| Decreased                                | 60      |                  | 81     | 37   | 86   | 0      | 61    |
| CLUSTER-SIMPROF group                    |         |                  | a      | b    | a    |        | b     |
| <b>Black Bream abundance</b>             |         |                  |        |      |      |        |       |
| Increased                                | 13      |                  | 6      | 14   | 16   | 100    | 7     |
| Not changed                              | 31      |                  | 13     | 7    | 30   | 0      | 53    |
| Decreased                                | 56      |                  | 81     | 79   | 56   | 0      | 37    |
| CLUSTER-SIMPROF group                    |         |                  | a      | a    | a    |        | b     |
| <b>Abundance of other species caught</b> |         |                  |        |      |      |        |       |
| Increased                                | 21      |                  | 25     | 21   | 14   | 100    | 21    |
| Not changed                              | 52      |                  | 69     | 52   | 43   | 0      | 50    |
| Decreased                                | 27      |                  | 6      | 28   | 43   | 0      | 29    |
| CLUSTER-SIMPROF group                    |         |                  | a      | b    | b    |        | c     |
| <b>Number of people fishing</b>          |         |                  |        |      |      |        |       |
| Increased                                | 63      |                  | 25     | 55   | 64   | 100    | 78    |
| Not changed                              | 32      |                  | 56     | 41   | 36   | 0      | 19    |
| Decreased                                | 5       |                  | 19     | 3    | 0    | 0      | 3     |
| CLUSTER-SIMPROF group                    |         |                  | a      | b    | b    |        | c     |
| <b>Number of sites I fish regularly</b>  |         |                  |        |      |      |        |       |
| Increased                                | 38      |                  | 31     | 34   | 29   | 0      | 45    |
| Not changed                              | 48      |                  | 38     | 55   | 64   | 100    | 41    |
| Decreased                                | 14      |                  | 31     | 10   | 7    | 0      | 14    |
| CLUSTER-SIMPROF group                    |         |                  | a      | a    | a    |        | b     |
| <b>Distance travelled</b>                |         |                  |        |      |      |        |       |
| Increased                                | 46      |                  | 60     | 21   | 50   | 0      | 55    |
| Not changed                              | 53      |                  | 40     | 75   | 50   | 100    | 45    |
| Decreased                                | 1       |                  | 0      | 4    | 0    | 0      | 0     |
| CLUSTER-SIMPROF group                    |         |                  | a      | b    | a    |        | b     |

**Supplementary Table S7:** Percentage of recreational Blue Swimmer Crab fishers that agreed, disagreed or were unsure about aspects of crab fishery management. Percentages given for all fishers overall and for those fishers utilising a particular fishing location. Cells shaded according to the magnitude of their values with those in dark red being the lowest and those in dark green the highest. The CLUSTER-SIMPROF groups assigned are given below. Fishing locations with the same letter indicate no significant difference in the percentage contribution across the possible answers, whereas those with different letters are deemed to be different.

| Blue Swimmer Crabs                         |         | Fishing location |          |          |          |          |
|--------------------------------------------|---------|------------------|----------|----------|----------|----------|
|                                            | Overall |                  | Peel     | Swan     | Lesch.   | Shark    |
| <b>The fishery is well managed</b>         |         |                  |          |          |          |          |
| Agree                                      | 27      |                  | 25       | 36       | 0        | 17       |
| Unsure                                     | 34      |                  | 30       | 30       | 50       | 33       |
| Disagree                                   | 39      |                  | 45       | 34       | 50       | 50       |
| CLUSTER-SIMPROF group                      |         |                  | <i>a</i> | <i>b</i> | <i>c</i> | <i>a</i> |
| <b>Stocks need to be better managed</b>    |         |                  |          |          |          |          |
| Agree                                      | 69      |                  | 70       | 66       | 85       | 83       |
| Unsure                                     | 22      |                  | 21       | 24       | 15       | 17       |
| Disagree                                   | 9       |                  | 8        | 10       | 0        | 0        |
| CLUSTER-SIMPROF group                      |         |                  | <i>a</i> | <i>a</i> | <i>b</i> | <i>b</i> |
| <b>I am happy with the number of crabs</b> |         |                  |          |          |          |          |
| Agree                                      | 34      |                  | 33       | 38       | 33       | 33       |
| Unsure                                     | 19      |                  | 19       | 18       | 11       | 0        |
| Disagree                                   | 47      |                  | 49       | 44       | 56       | 67       |
| CLUSTER-SIMPROF group                      |         |                  | <i>a</i> | <i>a</i> | <i>a</i> | <i>b</i> |
| <b>I am happy with the size of crabs</b>   |         |                  |          |          |          |          |
| Agree                                      | 39      |                  | 33       | 47       | 48       | 0        |
| Unsure                                     | 14      |                  | 12       | 11       | 4        | 17       |
| Disagree                                   | 48      |                  | 56       | 41       | 48       | 83       |
| CLUSTER-SIMPROF group                      |         |                  | <i>a</i> | <i>a</i> | <i>a</i> | <i>b</i> |

**Supplementary Table S8:** Percentage of recreational Black Bream that fishers agreed, disagreed or were unsure about aspects of fishery management. Percentages given for all fishers overall and for those fishers utilising a particular fishing location. Cells shaded according to the magnitude of their values with those in dark red being the lowest and those in dark green the highest. The CLUSTER-SIMPROF groups assigned are given below. Fishing locations with the same letter indicate no significant difference in the percentage contribution across the possible answers, whereas those with different letters are deemed to be different.

| Black Bream                                      |         | Fishing location |        |      |      |        |       |
|--------------------------------------------------|---------|------------------|--------|------|------|--------|-------|
|                                                  | Overall |                  | Black. | Peel | Swan | Wilson | Other |
| <b>The fishery is well managed</b>               |         |                  |        |      |      |        |       |
| Agree                                            | 14      |                  | 8      | 7    | 16   | 100    | 14    |
| Unsure                                           | 40      |                  | 31     | 14   | 47   | 0      | 39    |
| Disagree                                         | 46      |                  | 62     | 79   | 38   | 0      | 46    |
| CLUSTER-SIMPROF group                            |         |                  | a      | a    | b    |        | b     |
| <b>Stocks need to be better managed</b>          |         |                  |        |      |      |        |       |
| Agree                                            | 74      |                  | 85     | 86   | 74   | 0      | 64    |
| Unsure                                           | 24      |                  | 15     | 14   | 24   | 100    | 7     |
| Disagree                                         | 3       |                  | 0      | 0    | 2    | 0      | 29    |
| CLUSTER-SIMPROF group                            |         |                  | a      | a    | a    |        | b     |
| <b>I am happy with the number of Black Bream</b> |         |                  |        |      |      |        |       |
| Agree                                            | 26      |                  | 15     | 14   | 19   | 100    | 50    |
| Unsure                                           | 12      |                  | 23     | 0    | 16   | 0      | 43    |
| Disagree                                         | 61      |                  | 62     | 86   | 66   | 0      | 7     |
| CLUSTER-SIMPROF group                            |         |                  | a      | a    | a    |        | b     |
| <b>I am happy with the size of Black Bream</b>   |         |                  |        |      |      |        |       |
| Agree                                            | 22      |                  | 8      | 14   | 12   | 100    | 48    |
| Unsure                                           | 15      |                  | 23     | 21   | 16   | 0      | 45    |
| Disagree                                         | 63      |                  | 69     | 64   | 72   | 0      | 7     |
| CLUSTER-SIMPROF group                            |         |                  | a      | a    | a    |        | b     |



**Supplementary Table S9:** Percentage of recreational Blue Swimmer Crab fishers that chose a management acceptability rating for each of the nine options that currently are or could potentially be used to manage Blue Swimmer Crab fisheries in Western Australia. Mean rating values (very unacceptable = 1 to very acceptable = 5) are also provided. Percentages and means are given for all fishers overall and for those fishers utilising a particular fishing location and those belonging to a fisher group. Cells shaded according to the magnitude of their values with those in dark red being the lowest and those in dark green the highest. The CLUSTER-SIMPROF groups assigned are given below. Fishing locations and fisher groups with the same letter indicate no significant difference in the percentage contribution across the possible answers, whereas those with different letters are deemed to be different. Management options ordered by mean rating (i.e. acceptability).

| Blue Swimmer Crabs         |         | Fishing location |      |        |       | Fisher group |      |      |      |      |      |      |
|----------------------------|---------|------------------|------|--------|-------|--------------|------|------|------|------|------|------|
|                            | Overall | Peel             | Swan | Lesch. | Shark | a            | b    | c    | d    | e    | f    | g    |
| <b>Minimum size limit</b>  |         |                  |      |        |       |              |      |      |      |      |      |      |
| Very acceptable            | 84      | 84               | 84   | 81     | 50    | 100          | 84   | 82   | 84   | 80   | 88   | 100  |
| Acceptable                 | 10      | 9                | 8    | 19     | 33    | 0            | 4    | 11   | 14   | 20   | 11   | 0    |
| Neutral                    | 3       | 3                | 5    | 0      | 0     | 0            | 4    | 3    | 2    | 0    | 1    | 0    |
| Unacceptable               | 1       | 1                | 1    | 0      | 0     | 0            | 2    | 1    | 0    | 0    | 0    | 0    |
| Very unacceptable          | 2       | 3                | 2    | 0      | 17    | 0            | 7    | 4    | 0    | 0    | 0    | 0    |
| Average                    | 4.72    | 4.71             | 4.72 | 4.81   | 4.00  | 5.00         | 4.55 | 4.65 | 4.82 | 4.80 | 4.87 | 5.00 |
| CLUSTER-SIMPROF group      |         | a                | a    | b      | c     | a            | b    | b    | b    | b    | b    | a    |
| <b>Temporal closure</b>    |         |                  |      |        |       |              |      |      |      |      |      |      |
| Very acceptable            | 63      | 69               | 60   | 48     | 33    | 90           | 67   | 57   | 61   | 60   | 80   | 50   |
| Acceptable                 | 28      | 23               | 29   | 48     | 33    | 10           | 25   | 33   | 24   | 30   | 15   | 33   |
| Neutral                    | 5       | 3                | 5    | 0      | 0     | 0            | 4    | 5    | 6    | 10   | 3    | 17   |
| Unacceptable               | 2       | 2                | 2    | 4      | 17    | 0            | 0    | 2    | 6    | 0    | 0    | 0    |
| Very unacceptable          | 3       | 3                | 3    | 0      | 17    | 0            | 5    | 3    | 2    | 0    | 3    | 0    |
| Average                    | 4.46    | 4.52             | 4.41 | 4.41   | 3.50  | 4.90         | 4.47 | 4.39 | 4.37 | 4.50 | 4.69 | 4.33 |
| CLUSTER-SIMPROF group      |         | a                | a    | b      | c     | a            | b    | b    | b    | b    | a    | c    |
| <b>Fisher surveillance</b> |         |                  |      |        |       |              |      |      |      |      |      |      |
| Very acceptable            | 66      | 71               | 66   | 48     | 33    | 80           | 67   | 65   | 79   | 30   | 69   | 67   |
| Acceptable                 | 21      | 19               | 19   | 26     | 33    | 0            | 26   | 19   | 13   | 70   | 20   | 17   |
| Neutral                    | 7       | 3                | 9    | 15     | 17    | 10           | 2    | 8    | 6    | 0    | 7    | 17   |
| Unacceptable               | 3       | 3                | 4    | 4      | 0     | 10           | 4    | 3    | 2    | 0    | 1    | 0    |
| Very unacceptable          | 3       | 4                | 3    | 7      | 17    | 0            | 2    | 5    | 0    | 0    | 3    | 0    |
| Average                    | 4.44    | 4.50             | 4.41 | 4.04   | 3.67  | 4.50         | 4.53 | 4.37 | 4.69 | 4.30 | 4.52 | 4.50 |
| CLUSTER-SIMPROF group      |         | a                | a    | b      | b     | a            | a    | a    | a    | a    | a    | a    |
| <b>Fisher education</b>    |         |                  |      |        |       |              |      |      |      |      |      |      |
| Very acceptable            | 58      | 58               | 58   | 48     | 17    | 70           | 63   | 49   | 67   | 60   | 63   | 83   |
| Acceptable                 | 28      | 29               | 29   | 33     | 50    | 10           | 23   | 36   | 18   | 30   | 24   | 0    |
| Neutral                    | 10      | 7                | 8    | 19     | 17    | 20           | 9    | 10   | 10   | 10   | 12   | 17   |
| Unacceptable               | 2       | 3                | 2    | 0      | 17    | 0            | 4    | 2    | 2    | 0    | 1    | 0    |
| Very unacceptable          | 2       | 2                | 2    | 0      | 0     | 0            | 2    | 3    | 2    | 0    | 0    | 0    |
| Average                    | 4.38    | 4.39             | 4.39 | 4.30   | 3.67  | 4.50         | 4.42 | 4.26 | 4.47 | 4.50 | 4.48 | 4.67 |
| CLUSTER-SIMPROF group      |         | a                | a    | b      | c     | a            | b    | b    | b    | b    | b    | a    |
| <b>Stock enhancement</b>   |         |                  |      |        |       |              |      |      |      |      |      |      |
| Very acceptable            | 60      | 59               | 64   | 59     | 50    | 60           | 58   | 64   | 57   | 50   | 56   | 67   |
| Acceptable                 | 21      | 22               | 21   | 11     | 17    | 10           | 26   | 21   | 12   | 20   | 28   | 0    |
| Neutral                    | 14      | 13               | 10   | 22     | 17    | 20           | 12   | 10   | 18   | 30   | 11   | 33   |
| Unacceptable               | 3       | 2                | 2    | 0      | 17    | 10           | 2    | 4    | 2    | 0    | 3    | 0    |
| Very unacceptable          | 3       | 3                | 2    | 7      | 0     | 0            | 2    | 2    | 10   | 0    | 3    | 0    |
| Average                    | 4.33    | 4.32             | 4.42 | 4.15   | 4.00  | 4.20         | 4.37 | 4.40 | 4.04 | 4.20 | 4.32 | 4.33 |
| CLUSTER-SIMPROF group      |         | a                | a    | a      | a     | a            | a    | a    | a    | a    | a    | a    |
| <b>Bag limit</b>           |         |                  |      |        |       |              |      |      |      |      |      |      |
| Very acceptable            | 59      | 61               | 61   | 56     | 33    | 90           | 54   | 60   | 53   | 40   | 68   | 67   |
| Acceptable                 | 26      | 22               | 25   | 37     | 33    | 10           | 28   | 23   | 20   | 30   | 25   | 33   |
| Neutral                    | 8       | 8                | 7    | 0      | 0     | 0            | 7    | 7    | 16   | 10   | 3    | 0    |
| Unacceptable               | 5       | 5                | 5    | 0      | 33    | 0            | 9    | 5    | 2    | 20   | 3    | 0    |
| Very unacceptable          | 3       | 4                | 2    | 7      | 0     | 0            | 2    | 4    | 8    | 0    | 1    | 0    |
| Average                    | 4.32    | 4.32             | 4.39 | 4.33   | 3.67  | 4.90         | 4.25 | 4.30 | 4.08 | 3.90 | 4.56 | 4.67 |
| CLUSTER-SIMPROF group      |         | a                | a    | b      | c     | a            | b    | b    | c    | d    | b    | b    |
| <b>Gear restriction</b>    |         |                  |      |        |       |              |      |      |      |      |      |      |
| Very acceptable            | 38      | 38               | 43   | 33     | 17    | 60           | 33   | 31   | 29   | 30   | 44   | 67   |
| Acceptable                 | 28      | 27               | 27   | 33     | 67    | 10           | 30   | 35   | 29   | 30   | 28   | 17   |
| Neutral                    | 17      | 19               | 12   | 11     | 0     | 0            | 12   | 18   | 22   | 10   | 17   | 17   |
| Unacceptable               | 11      | 12               | 10   | 15     | 17    | 10           | 16   | 10   | 12   | 30   | 8    | 0    |
| Very unacceptable          | 6       | 5                | 7    | 7      | 0     | 20           | 9    | 6    | 8    | 0    | 3    | 0    |
| Average                    | 3.81    | 3.80             | 3.88 | 3.70   | 3.83  | 3.80         | 3.63 | 3.77 | 3.57 | 3.60 | 4.03 | 4.50 |
| CLUSTER-SIMPROF group      |         | a                | a    | a      | b     | a            | b    | b    | b    | b    | b    | a    |

**Supplementary Table S9 continued:** Percentage of recreational Blue Swimmer Crab fishers that chose a management acceptability rating for each of the nine options that currently are or could potentially be used to manage Blue Swimmer Crab fisheries in Western Australia. Mean rating values (very unacceptable = 1 to very acceptable = 5) are also provided. Percentages and means are given for all fishers overall and for those fishers utilising a particular fishing location and those belonging to a fisher group. Cells shaded according to the magnitude of their values with those in dark red being the lowest and those in dark green the highest. The CLUSTER-SIMPROF groups assigned are given below. Fishing locations and fisher groups with the same letter indicate no significant difference in the percentage contribution across the possible answers, whereas those with different letters are deemed to be different. Management options ordered by mean rating (i.e. acceptability).

| Blue Swimmer Crabs        |         | Fishing location |      |        |       |  | Fisher group |      |      |      |      |      |      |
|---------------------------|---------|------------------|------|--------|-------|--|--------------|------|------|------|------|------|------|
|                           | Overall | Peel             | Swan | Lesch. | Shark |  | a            | b    | c    | d    | e    | f    | g    |
| <b>Spatial closure</b>    |         |                  |      |        |       |  |              |      |      |      |      |      |      |
| Very acceptable           | 33      | 30               | 35   | 33     | 33    |  | 30           | 32   | 28   | 29   | 30   | 51   | 33   |
| Acceptable                | 27      | 26               | 29   | 22     | 17    |  | 20           | 21   | 33   | 24   | 50   | 24   | 50   |
| Neutral                   | 19      | 20               | 18   | 15     | 17    |  | 20           | 20   | 17   | 24   | 20   | 16   | 17   |
| Unacceptable              | 12      | 14               | 10   | 19     | 33    |  | 20           | 14   | 13   | 6    | 0    | 9    | 0    |
| Very unacceptable         | 8       | 11               | 8    | 11     | 0     |  | 10           | 13   | 10   | 16   | 0    | 0    | 0    |
| Average                   | 3.66    | 3.51             | 3.72 | 3.48   | 3.50  |  | 3.40         | 3.46 | 3.55 | 3.43 | 4.10 | 4.16 | 4.17 |
| CLUSTER-SIMPROF group     |         | a                | a    | a      | b     |  | b            | b    | b    | b    | b    | b    | a    |
| <b>Maximum size limit</b> |         |                  |      |        |       |  |              |      |      |      |      |      |      |
| Very acceptable           | 15      | 13               | 19   | 19     | 0     |  | 10           | 18   | 16   | 10   | 20   | 17   | 17   |
| Acceptable                | 9       | 7                | 10   | 4      | 0     |  | 10           | 5    | 5    | 10   | 30   | 16   | 0    |
| Neutral                   | 32      | 32               | 27   | 33     | 67    |  | 20           | 27   | 30   | 35   | 20   | 36   | 67   |
| Unacceptable              | 25      | 27               | 23   | 19     | 33    |  | 30           | 25   | 28   | 18   | 20   | 25   | 0    |
| Very unacceptable         | 20      | 22               | 21   | 26     | 0     |  | 30           | 24   | 21   | 27   | 10   | 5    | 17   |
| Average                   | 2.75    | 2.63             | 2.84 | 2.70   | 2.67  |  | 2.40         | 2.69 | 2.66 | 2.59 | 3.30 | 3.15 | 3.00 |
| CLUSTER-SIMPROF group     |         | a                | a    | a      | b     |  | a            | a    | a    | a    | a    | a    | b    |

**Supplementary Table S10:** Percentage of recreational Black Bream fishers that chose a management acceptability rating for each of the ten options that currently are or could potentially be used to manage Black Bream fisheries in Western Australia. Mean rating values (very unacceptable = 1 to very acceptable = 5) are also provided. Percentages and means are given for all fishers overall and for those fishers utilising a particular fishing location and those belonging to a fisher group. Cells shaded according to the magnitude of their values with those in dark red being the lowest and those in dark green the highest. The CLUSTER-SIMPROF groups assigned are given below for fishing locations only. Those with the same letter indicate no significant difference in the percentage contribution across the possible answers, whereas those with different letters are deemed to be different. No tested was done on fisher groups due to the low number of responses from fishers in some groups. Management options ordered by mean rating (i.e. acceptability).

| Black Bream                    |         |  | Fishing location |      |      |        |       | Fisher group |      |      |      |      |      |
|--------------------------------|---------|--|------------------|------|------|--------|-------|--------------|------|------|------|------|------|
|                                | Overall |  | Black            | Peel | Swan | Wilson | Other |              | a    | b    | c    | d    | e    |
| Minimum size limit             |         |  |                  |      |      |        |       |              |      |      |      |      |      |
| Very acceptable                | 78      |  | 92               | 71   | 79   | 100    | 72    |              | 0    | 100  | 67   | 81   | 77   |
| Acceptable                     | 13      |  | 8                | 14   | 12   | 0      | 17    |              | 100  | 0    | 33   | 10   | 11   |
| Neutral                        | 2       |  | 0                | 0    | 4    | 0      | 0     |              | 0    | 0    | 0    | 0    | 6    |
| Unacceptable                   | 3       |  | 0                | 7    | 2    | 0      | 3     |              | 0    | 0    | 0    | 5    | 0    |
| Very unacceptable              | 4       |  | 0                | 7    | 4    | 0      | 7     |              | 0    | 0    | 0    | 3    | 6    |
| Average                        | 4.58    |  | 4.92             | 4.36 | 4.61 | 5.00   | 4.45  |              | 4.00 | 5.00 | 4.67 | 4.61 | 4.54 |
| CLUSTER-SIMPROF group          |         |  | a                | c    | b    |        | c     |              |      |      |      |      |      |
| Stock enhancement              |         |  |                  |      |      |        |       |              |      |      |      |      |      |
| Very acceptable                | 73      |  | 75               | 86   | 70   | 0      | 72    |              | 100  | 100  | 50   | 66   | 86   |
| Acceptable                     | 18      |  | 8                | 7    | 23   | 100    | 14    |              | 0    | 0    | 0    | 22   | 11   |
| Neutral                        | 7       |  | 17               | 7    | 4    | 0      | 10    |              | 0    | 0    | 50   | 8    | 0    |
| Unacceptable                   | 0       |  | 0                | 0    | 0    | 0      | 0     |              | 0    | 0    | 0    | 0    | 0    |
| Very unacceptable              | 3       |  | 0                | 0    | 4    | 0      | 3     |              | 0    | 0    | 0    | 3    | 3    |
| Average                        | 4.58    |  | 4.58             | 4.79 | 4.56 | 4.00   | 4.52  |              | 5.00 | 5.00 | 4.00 | 4.47 | 4.77 |
| CLUSTER-SIMPROF group          |         |  | a                | a    | a    |        | a     |              |      |      |      |      |      |
| Fisher education               |         |  |                  |      |      |        |       |              |      |      |      |      |      |
| Very acceptable                | 63      |  | 67               | 79   | 52   | 100    | 72    |              | 0    | 100  | 50   | 58   | 68   |
| Acceptable                     | 27      |  | 8                | 21   | 36   | 0      | 21    |              | 100  | 0    | 50   | 29   | 21   |
| Neutral                        | 8       |  | 25               | 0    | 9    | 0      | 3     |              | 0    | 0    | 0    | 10   | 9    |
| Unacceptable                   | 0       |  | 0                | 0    | 0    | 0      | 0     |              | 0    | 0    | 0    | 0    | 0    |
| Very unacceptable              | 3       |  | 0                | 0    | 4    | 0      | 3     |              | 0    | 0    | 0    | 3    | 3    |
| Average                        | 4.46    |  | 4.42             | 4.79 | 4.32 | 5.00   | 4.59  |              | 4.00 | 5.00 | 4.50 | 4.37 | 4.50 |
| CLUSTER-SIMPROF group          |         |  | a                | a    | a    |        | a     |              |      |      |      |      |      |
| Maximum size limit             |         |  |                  |      |      |        |       |              |      |      |      |      |      |
| Very acceptable                | 67      |  | 67               | 79   | 67   | 100    | 62    |              | 0    | 100  | 50   | 63   | 77   |
| Acceptable                     | 17      |  | 8                | 7    | 18   | 0      | 24    |              | 100  | 0    | 17   | 20   | 11   |
| Neutral                        | 9       |  | 25               | 7    | 11   | 0      | 0     |              | 0    | 0    | 17   | 8    | 9    |
| Unacceptable                   | 3       |  | 0                | 7    | 0    | 0      | 7     |              | 0    | 0    | 17   | 3    | 0    |
| Very unacceptable              | 4       |  | 0                | 0    | 5    | 0      | 7     |              | 0    | 0    | 0    | 5    | 3    |
| Average                        | 4.40    |  | 4.42             | 4.57 | 4.40 | 5.00   | 4.28  |              | 4.00 | 5.00 | 4.00 | 4.32 | 4.60 |
| CLUSTER-SIMPROF group          |         |  | a                | a    | a    |        | a     |              |      |      |      |      |      |
| Restricting commercial fishing |         |  |                  |      |      |        |       |              |      |      |      |      |      |
| Very acceptable                | 56      |  | 67               | 86   | 49   | 0      | 52    |              | 0    | 100  | 33   | 49   | 69   |
| Acceptable                     | 26      |  | 25               | 7    | 28   | 100    | 28    |              | 100  | 0    | 17   | 27   | 20   |
| Neutral                        | 16      |  | 8                | 7    | 19   | 0      | 17    |              | 0    | 0    | 50   | 20   | 9    |
| Unacceptable                   | 1       |  | 0                | 0    | 0    | 0      | 3     |              | 0    | 0    | 0    | 0    | 3    |
| Very unacceptable              | 2       |  | 0                | 0    | 4    | 0      | 0     |              | 0    | 0    | 0    | 3    | 0    |
| Average                        | 4.33    |  | 4.58             | 4.79 | 4.19 | 4.00   | 4.28  |              | 4.00 | 5.00 | 3.83 | 4.19 | 4.54 |
| CLUSTER-SIMPROF group          |         |  | a                | b    | a    |        | a     |              |      |      |      |      |      |
| Fisher surveillance            |         |  |                  |      |      |        |       |              |      |      |      |      |      |
| Very acceptable                | 58      |  | 58               | 93   | 54   | 100    | 45    |              | 0    | 100  | 67   | 47   | 71   |
| Acceptable                     | 27      |  | 17               | 7    | 32   | 0      | 34    |              | 0    | 0    | 17   | 32   | 20   |
| Neutral                        | 7       |  | 17               | 0    | 9    | 0      | 3     |              | 0    | 0    | 0    | 10   | 6    |
| Unacceptable                   | 3       |  | 0                | 0    | 0    | 0      | 10    |              | 100  | 0    | 17   | 2    | 0    |
| Very unacceptable              | 5       |  | 8                | 0    | 5    | 0      | 7     |              | 0    | 0    | 0    | 8    | 3    |
| Average                        | 4.29    |  | 4.17             | 4.93 | 4.30 | 5.00   | 4.00  |              | 2.00 | 5.00 | 4.33 | 4.08 | 4.57 |
| CLUSTER-SIMPROF group          |         |  | a                | b    | a    |        | a     |              |      |      |      |      |      |
| Bag limit                      |         |  |                  |      |      |        |       |              |      |      |      |      |      |
| Very acceptable                | 58      |  | 50               | 36   | 65   | 0      | 59    |              | 0    | 100  | 50   | 61   | 60   |
| Acceptable                     | 17      |  | 17               | 21   | 14   | 0      | 21    |              | 100  | 0    | 50   | 17   | 9    |
| Neutral                        | 11      |  | 33               | 0    | 9    | 100    | 7     |              | 0    | 0    | 0    | 8    | 11   |
| Unacceptable                   | 6       |  | 0                | 0    | 9    | 0      | 7     |              | 0    | 0    | 0    | 5    | 11   |
| Very unacceptable              | 9       |  | 0                | 43   | 4    | 0      | 7     |              | 0    | 0    | 0    | 8    | 9    |
| Average                        | 4.08    |  | 4.17             | 3.07 | 4.28 | 3.00   | 4.17  |              | 4.00 | 5.00 | 4.50 | 4.17 | 4.00 |
| CLUSTER-SIMPROF group          |         |  | b                | a    | c    |        | c     |              |      |      |      |      |      |

**Supplementary Table S10 continued:** Percentage of recreational Black Bream fishers that chose a management acceptability rating for each of the ten options that currently are or could potentially be used to manage Black Bream fisheries in Western Australia. Mean rating values (very unacceptable = 1 to very acceptable = 5) are also provided. Percentages and means are given for all fishers overall and for those fishers utilising a particular fishing location and those belonging to a fisher group. Cells shaded according to the magnitude of their values with those in dark red being the lowest and those in dark green the highest. The CLUSTER-SIMPROF groups assigned are given below for fishing locations only. Those with the same letter indicate no significant difference in the percentage contribution across the possible answers, whereas those with different letters are deemed to be different. No tested was done on fisher groups due to the low number of responses from fishers in some groups. Management options ordered by mean rating (i.e. acceptability).

| Black Bream                             |         | Fishing location |       |      |      |        |       | Fisher group |      |      |      |      |      |
|-----------------------------------------|---------|------------------|-------|------|------|--------|-------|--------------|------|------|------|------|------|
|                                         | Overall |                  | Black | Peel | Swan | Wilson | Other |              | a    | b    | c    | d    | e    |
| <b>Spatial closure</b>                  |         |                  |       |      |      |        |       |              |      |      |      |      |      |
| Very acceptable                         | 8       |                  | 17    | 21   | 7    | 0      | 0     |              | 0    | 0    | 0    | 8    | 11   |
| Acceptable                              | 28      |                  | 17    | 36   | 26   | 0      | 34    |              | 0    | 0    | 33   | 31   | 26   |
| Neutral                                 | 27      |                  | 25    | 14   | 33   | 100    | 17    |              | 100  | 33   | 0    | 25   | 29   |
| Unacceptable                            | 16      |                  | 25    | 7    | 16   | 0      | 17    |              | 0    | 33   | 17   | 20   | 9    |
| Very unacceptable                       | 21      |                  | 17    | 21   | 18   | 0      | 31    |              | 0    | 33   | 50   | 15   | 26   |
| Average                                 | 2.86    |                  | 2.92  | 3.29 | 2.89 | 3.00   | 2.55  |              | 3.00 | 2.00 | 2.17 | 2.97 | 2.89 |
| CLUSTER-SIMPROF group                   |         |                  | a     | a    | a    |        | a     |              |      |      |      |      |      |
| <b>Temporal closure</b>                 |         |                  |       |      |      |        |       |              |      |      |      |      |      |
| Very acceptable                         | 13      |                  | 42    | 36   | 7    | 0      | 3     |              | 0    | 0    | 17   | 15   | 14   |
| Acceptable                              | 17      |                  | 0     | 0    | 21   | 0      | 24    |              | 100  | 0    | 0    | 19   | 14   |
| Neutral                                 | 21      |                  | 25    | 21   | 18   | 0      | 28    |              | 0    | 67   | 50   | 19   | 23   |
| Unacceptable                            | 24      |                  | 17    | 29   | 28   | 0      | 17    |              | 0    | 0    | 33   | 22   | 20   |
| Very unacceptable                       | 25      |                  | 17    | 14   | 26   | 100    | 28    |              | 0    | 33   | 0    | 25   | 29   |
| Average                                 | 2.70    |                  | 3.33  | 3.14 | 2.54 | 1.00   | 2.59  |              | 4.00 | 2.33 | 3.00 | 2.76 | 2.66 |
| CLUSTER-SIMPROF group                   |         |                  | a     | a    | b    |        | b     |              |      |      |      |      |      |
| <b>Restricting recreational fishing</b> |         |                  |       |      |      |        |       |              |      |      |      |      |      |
| Very acceptable                         | 4       |                  | 17    | 0    | 4    | 0      | 3     |              | 0    | 0    | 17   | 5    | 3    |
| Acceptable                              | 16      |                  | 17    | 14   | 16   | 100    | 14    |              | 100  | 0    | 0    | 17   | 20   |
| Neutral                                 | 12      |                  | 8     | 21   | 14   | 0      | 7     |              | 0    | 0    | 0    | 19   | 3    |
| Unacceptable                            | 27      |                  | 17    | 21   | 33   | 0      | 21    |              | 0    | 67   | 33   | 24   | 29   |
| Very unacceptable                       | 41      |                  | 42    | 43   | 33   | 0      | 55    |              | 0    | 33   | 50   | 36   | 46   |
| Average                                 | 2.17    |                  | 2.50  | 2.07 | 2.23 | 4.00   | 1.90  |              | 4.00 | 1.67 | 2.00 | 2.32 | 2.06 |
| CLUSTER-SIMPROF group                   |         |                  | a     | a    | a    |        | a     |              |      |      |      |      |      |

**Supplementary Table S11:** Percentage of recreational Blue Swimmer Crab fishers that chose an option about whether management option should change or remain the same. Percentages are given for all fishers overall and for those fishers utilising a particular fishing location and those belonging to a fisher group. Cells shaded according to the magnitude of their values with those in dark red being the lowest and those in dark green the highest. The CLUSTER-SIMPROF groups assigned are given below. Fishing locations and fisher groups with the same letter indicate no significant difference in the percentage contribution across the possible answers, whereas those with different letters are deemed to be different.

| Blue Swimmer Crabs    |         |  | Fishing location |      |        |       |  | Fisher group |    |    |    |    |    |     |
|-----------------------|---------|--|------------------|------|--------|-------|--|--------------|----|----|----|----|----|-----|
|                       | Overall |  | Peel             | Swan | Lesch. | Shark |  | a            | b  | c  | d  | e  | f  | g   |
| Minimum size limit    |         |  |                  |      |        |       |  |              |    |    |    |    |    |     |
| Increase              | 34      |  | 33               | 37   | 30     | 17    |  | 11           | 38 | 32 | 23 | 50 | 39 | 67  |
| Remain the same       | 65      |  | 65               | 61   | 65     | 83    |  | 67           | 63 | 67 | 77 | 50 | 60 | 33  |
| Decrease              | 1       |  | 1                | 1    | 4      | 0     |  | 11           | 0  | 1  | 0  | 0  | 0  | 0   |
| Unsure                | 1       |  | 1                | 1    | 0      | 0     |  | 11           | 0  | 0  | 0  | 0  | 1  | 0   |
| CLUSTER-SIMPROF group |         |  | a                | a    | a      | b     |  | a            | b  | b  | c  | d  | b  | d   |
| Temporal closure      |         |  |                  |      |        |       |  |              |    |    |    |    |    |     |
| Increase              | 52      |  | 60               | 47   | 46     | 67    |  | 0            | 4  | 9  | 6  | 40 | 3  | 17  |
| Remain the same       | 40      |  | 35               | 45   | 42     | 33    |  | 80           | 81 | 67 | 82 | 40 | 67 | 67  |
| Decrease              | 3       |  | 2                | 3    | 0      | 0     |  | 20           | 14 | 24 | 12 | 20 | 28 | 17  |
| Unsure                | 5       |  | 3                | 5    | 13     | 0     |  | 0            | 2  | 1  | 0  | 0  | 3  | 0   |
| CLUSTER-SIMPROF group |         |  | a                | b    | b      | a     |  | a            | a  | b  | a  | c  | b  | d   |
| Fisher surveillance   |         |  |                  |      |        |       |  |              |    |    |    |    |    |     |
| Increase              | 83      |  | 87               | 82   | 75     | 100   |  | 70           | 86 | 87 | 80 | 70 | 87 | 67  |
| Remain the same       | 13      |  | 9                | 14   | 21     | 0     |  | 20           | 13 | 10 | 18 | 30 | 8  | 33  |
| Decrease              | 1       |  | 1                | 1    | 0      | 0     |  | 0            | 0  | 1  | 2  | 0  | 0  | 0   |
| Unsure                | 3       |  | 3                | 2    | 4      | 0     |  | 10           | 2  | 2  | 0  | 0  | 5  | 0   |
| CLUSTER-SIMPROF group |         |  | a                | a    | a      | b     |  | a            | b  | b  | b  | a  | b  | a   |
| Fisher education      |         |  |                  |      |        |       |  |              |    |    |    |    |    |     |
| Increase              | 82      |  | 82               | 85   | 75     | 83    |  | 100          | 88 | 79 | 79 | 70 | 81 | 100 |
| Remain the same       | 14      |  | 14               | 13   | 21     | 0     |  | 0            | 11 | 17 | 15 | 30 | 15 | 0   |
| Decrease              | 1       |  | 1                | 2    | 4      | 17    |  | 0            | 0  | 2  | 0  | 0  | 0  | 0   |
| Unsure                | 3       |  | 3                | 1    | 0      | 0     |  | 0            | 2  | 1  | 6  | 0  | 4  | 0   |
| CLUSTER-SIMPROF group |         |  | a                | a    | a      | a     |  | a            | b  | b  | b  | b  | b  | a   |
| Bag limit             |         |  |                  |      |        |       |  |              |    |    |    |    |    |     |
| Increase              | 7       |  | 9                | 3    | 0      | 0     |  | 0            | 4  | 9  | 6  | 40 | 3  | 17  |
| Remain the same       | 71      |  | 72               | 73   | 67     | 67    |  | 80           | 81 | 67 | 82 | 40 | 67 | 67  |
| Decrease              | 21      |  | 18               | 24   | 33     | 33    |  | 20           | 14 | 24 | 12 | 20 | 28 | 17  |
| Unsure                | 1       |  | 1                | 1    | 0      | 0     |  | 0            | 2  | 1  | 0  | 0  | 3  | 0   |
| CLUSTER-SIMPROF group |         |  | a                | a    | b      | b     |  | a            | a  | c  | a  | d  | c  | b   |
| Boat limit            |         |  |                  |      |        |       |  |              |    |    |    |    |    |     |
| Increase              | 12      |  | 13               | 10   | 4      | 0     |  | 20           | 12 | 13 | 10 | 40 | 5  | 33  |
| Remain the same       | 67      |  | 68               | 70   | 67     | 83    |  | 60           | 77 | 69 | 73 | 50 | 55 | 50  |
| Decrease              | 19      |  | 18               | 20   | 29     | 17    |  | 20           | 11 | 18 | 15 | 10 | 31 | 17  |
| Unsure                | 2       |  | 2                | 0    | 0      | 0     |  | 0            | 0  | 0  | 2  | 0  | 9  | 0   |
| CLUSTER-SIMPROF group |         |  | a                | a    | a      | a     |  | a            | a  | a  | a  | c  | b  | c   |



**Supplementary Table S12:** Percentage of recreational Black Breem fishers that chose an option about whether management option should change or remain the same. Percentages are given for all fishers overall and for those fishers utilising a particular fishing location and those belonging to a fisher group. Cells shaded according to the magnitude of their values with those in dark red being the lowest and those in dark green the highest. The CLUSTER-SIMPROF groups assigned are given below. Fishing locations and fisher groups with the same letter indicate no significant difference in the percentage contribution across the possible answers, whereas those with different letters are deemed to be different.

| Black Bream           |         |  | Fishing location |      |      |        |       |  | Fisher group |     |    |    |    |
|-----------------------|---------|--|------------------|------|------|--------|-------|--|--------------|-----|----|----|----|
|                       | Overall |  | Black            | Peel | Swan | Wilson | Other |  | a            | b   | c  | d  | e  |
| Minimum size limit    |         |  |                  |      |      |        |       |  |              |     |    |    |    |
| Increase              | 45      |  | 33               | 31   | 47   | 0      | 55    |  | 0            | 67  | 33 | 43 | 49 |
| Remain the same       | 54      |  | 67               | 69   | 51   | 100    | 45    |  | 100          | 33  | 67 | 55 | 51 |
| Decrease              | 1       |  | 0                | 0    | 2    | 0      | 0     |  | 0            | 0   | 0  | 2  | 0  |
| Unsure                | 0       |  | 0                | 0    | 0    | 0      | 0     |  | 0            | 0   | 0  | 0  | 0  |
| CLUSTER-SIMPROF group |         |  | a                | a    | a    |        | a     |  |              |     |    |    |    |
| Fisher education      |         |  |                  |      |      |        |       |  |              |     |    |    |    |
| Increase              | 88      |  | 75               | 92   | 91   | 100    | 86    |  | 100          | 100 | 50 | 92 | 89 |
| Remain the same       | 9       |  | 17               | 8    | 7    | 0      | 10    |  | 0            | 0   | 50 | 5  | 9  |
| Decrease              | 0       |  | 0                | 0    | 0    | 0      | 0     |  | 0            | 0   | 0  | 0  | 0  |
| Unsure                | 3       |  | 8                | 0    | 2    | 0      | 3     |  | 0            | 0   | 0  | 7  | 3  |
| CLUSTER-SIMPROF group |         |  | a                | b    | b    |        | b     |  |              |     |    |    |    |
| Fisher surveillance   |         |  |                  |      |      |        |       |  |              |     |    |    |    |
| Increase              | 83      |  | 75               | 85   | 86   | 100    | 79    |  | 100          | 100 | 67 | 78 | 97 |
| Remain the same       | 11      |  | 17               | 15   | 7    | 0      | 14    |  | 0            | 0   | 33 | 14 | 0  |
| Decrease              | 1       |  | 8                | 0    | 0    | 0      | 0     |  | 0            | 0   | 0  | 2  | 0  |
| Unsure                | 5       |  | 0                | 0    | 7    | 0      | 7     |  | 0            | 0   | 0  | 7  | 3  |
| CLUSTER-SIMPROF group |         |  | a                | a    | a    |        | a     |  |              |     |    |    |    |
| Bag limit             |         |  |                  |      |      |        |       |  |              |     |    |    |    |
| Increase              | 5       |  | 0                | 0    | 7    | 0      | 7     |  | 0            | 0   | 0  | 8  | 3  |
| Remain the same       | 36      |  | 50               | 23   | 34   | 0      | 41    |  | 100          | 0   | 50 | 39 | 29 |
| Decrease              | 58      |  | 50               | 77   | 57   | 100    | 52    |  | 0            | 100 | 50 | 51 | 69 |
| Unsure                | 1       |  | 0                | 0    | 2    | 0      | 0     |  | 0            | 0   | 0  | 2  | 0  |
| CLUSTER-SIMPROF group |         |  | a                | a    | a    |        | a     |  |              |     |    |    |    |
| Boat limit            |         |  |                  |      |      |        |       |  |              |     |    |    |    |
| Increase              | 5       |  | 0                | 8    | 5    | 0      | 7     |  | 0            | 0   | 0  | 8  | 3  |
| Remain the same       | 40      |  | 58               | 38   | 36   | 0      | 41    |  | 100          | 0   | 83 | 39 | 37 |
| Decrease              | 49      |  | 42               | 54   | 48   | 100    | 48    |  | 0            | 67  | 17 | 44 | 60 |
| Unsure                | 6       |  | 0                | 0    | 11   | 0      | 3     |  | 0            | 33  | 0  | 8  | 0  |
| CLUSTER-SIMPROF group |         |  | a                | a    | a    |        | a     |  |              |     |    |    |    |

**Supplementary Table S13:** Mean ratings for each Blue Swimmer Crab stock enhancement belief across (a) belief strength (0; very unlikely to 6; very likely), (b) belief evaluation (-3; very bad to +3; very good) and (c) cross-products (belief-based attitude: -18; very likely and very bad to +18; very likely and very good) for each fishing location and fisher group. Cells shaded according to the magnitude of their values with for belief strength and belief evaluation those in dark red being the lowest and those in dark green the highest and for the belief-based attitude from dark red to dark blue.

| Blue Swimmer Crabs                 |         | Fishing location |       |        |       |  | Fisher groups |       |       |       |       |       |       |
|------------------------------------|---------|------------------|-------|--------|-------|--|---------------|-------|-------|-------|-------|-------|-------|
| Belief strength (0 to 6)           | Overall | Peel             | Swan  | Lesch. | Shark |  | a             | b     | c     | d     | e     | f     | g     |
| Increasing crab numbers            | 4.78    | 4.73             | 4.88  | 5.15   | 5.40  |  | 5.20          | 4.75  | 4.79  | 4.29  | 4.63  | 4.96  | 5.00  |
| More crabs to catch                | 4.82    | 4.78             | 4.85  | 5.19   | 5.00  |  | 5.25          | 4.67  | 4.87  | 4.38  | 4.78  | 4.86  | 4.67  |
| More fishers fishing               | 4.54    | 4.59             | 4.38  | 4.81   | 4.67  |  | 5.14          | 4.42  | 4.43  | 4.69  | 3.90  | 4.77  | 5.40  |
| No change in crab abundance        | 2.20    | 2.27             | 2.01  | 1.61   | 1.20  |  | 1.86          | 2.57  | 2.08  | 2.85  | 3.50  | 1.81  | 2.25  |
| Increasing fishing pressure        | 3.05    | 3.09             | 2.83  | 3.17   | 1.50  |  | 2.38          | 2.87  | 3.14  | 3.34  | 1.88  | 3.18  | 5.00  |
| Environment impact                 | 2.87    | 2.62             | 2.94  | 2.57   | 1.00  |  | 2.60          | 2.14  | 3.02  | 2.98  | 3.22  | 3.26  | 3.00  |
| CLUSTER-SIMPROF group              |         | a                | a     | a      | b     |  | a             | a     | a     | a     | a     | a     | a     |
|                                    |         |                  |       |        |       |  |               |       |       |       |       |       |       |
| Belief evaluation (-3 to +3)       |         |                  |       |        |       |  |               |       |       |       |       |       |       |
| Increasing crab numbers            | 2.14    | 2.14             | 2.12  | 2.20   | 2.67  |  | 2.33          | 2.12  | 2.26  | 1.87  | 1.90  | 2.13  | 3.00  |
| More crabs to catch                | 2.17    | 2.17             | 2.17  | 2.55   | 2.50  |  | 2.80          | 2.04  | 2.25  | 2.07  | 2.10  | 2.09  | 1.20  |
| More fishers fishing               | -0.55   | -0.77            | -0.35 | 0.60   | 0.50  |  | 1.14          | -0.44 | -0.55 | -0.86 | 0.29  | -0.69 | -1.20 |
| No change in crab abundance        | -1.31   | -1.32            | -1.45 | -1.35  | -2.33 |  | -2.00         | -1.22 | -1.36 | -0.95 | 0.80  | -1.64 | -2.00 |
| Increasing fishing pressure        | -1.50   | -1.46            | -1.70 | -1.26  | -2.33 |  | -1.67         | -1.44 | -1.47 | -1.49 | -1.11 | -1.67 | -1.60 |
| Environment impact                 | -1.30   | -1.38            | -1.34 | -0.31  | -2.20 |  | -0.88         | -1.43 | -1.19 | -1.46 | 0.13  | -1.39 | -1.50 |
| CLUSTER-SIMPROF group              |         | a                | a     | a      | a     |  | a             | b     | b     | b     | c     | b     | d     |
|                                    |         |                  |       |        |       |  |               |       |       |       |       |       |       |
| Belief-based attitude (-18 to +18) |         |                  |       |        |       |  |               |       |       |       |       |       |       |
| Increasing crab numbers            | 10.45   | 10.25            | 11.01 | 11.25  | 12.17 |  | 13.11         | 9.76  | 10.74 | 9.96  | 8.00  | 10.83 | 11.25 |
| More crabs to catch                | 10.39   | 10.11            | 10.66 | 13.75  | 13.33 |  | 11.80         | 9.06  | 10.85 | 10.57 | 10.30 | 9.56  | 4.40  |
| More fishers fishing               | -1.18   | -1.85            | -0.30 | 3.60   | 4.17  |  | 2.86          | 0.44  | -0.76 | -2.81 | 3.00  | -2.86 | -6.40 |
| No change in crab abundance        | -1.28   | -1.15            | -1.68 | -1.00  | -1.83 |  | -0.50         | -1.73 | -1.57 | -1.43 | 4.80  | -1.23 | -4.25 |
| Increasing fishing pressure        | -3.41   | -3.46            | -3.52 | -3.63  | -2.83 |  | -5.83         | -3.12 | -3.40 | -2.82 | 1.67  | -4.31 | -7.00 |
| Environment impact                 | -2.10   | -2.45            | -2.55 | 1.50   | -1.20 |  | -2.50         | -1.65 | -2.30 | -2.54 | 2.75  | -2.25 | -3.00 |
| CLUSTER-SIMPROF group              |         | a                | a     | b      | b     |  | a             | b     | b     | b     | c     | b     | d     |

**Supplementary Table S14:** Mean ratings for each Black Bream stock enhancement of belief across (a) belief strength (0; very unlikely to 6; very likely), (b) belief evaluation (-3; very bad to +3; very good) and (c) cross-products (belief-based attitude: -18; very likely and very bad to +18; very likely and very good) overall and for each fishing location and fisher group. Cells shaded according to the magnitude of their values with for belief strength and belief evaluation those in dark red being the lowest and those in dark green the highest and for the belief-based attitude from dark red to dark blue.

| Black Bream                               |         | Fishing location |       |       |        |       | Fisher groups |       |       |       |       |
|-------------------------------------------|---------|------------------|-------|-------|--------|-------|---------------|-------|-------|-------|-------|
| <i>Belief strength (0 to 6)</i>           | Overall | Black.           | Peel  | Swan  | Wilson | Other | a             | b     | c     | d     | e     |
| Increasing the number of bream            | 5.34    | 5.45             | 5.08  | 5.35  | 5.00   | 5.38  | 4.00          | 6.00  | 5.00  | 5.26  | 5.47  |
| More bream to catch                       | 5.31    | 5.55             | 5.09  | 5.40  | 4.00   | 5.19  |               | 5.50  | 4.83  | 5.15  | 5.72  |
| Too many Black Bream                      | 1.08    | 1.20             | 0.67  | 1.11  | 4.00   | 1.04  |               | 0.00  | 0.83  | 0.98  | 1.10  |
| Less bream surviving                      | 1.17    | 1.71             | 0.82  | 1.05  | 3.00   | 1.29  |               | 0.00  | 1.00  | 1.57  | 0.60  |
| Increasing fishing pressure               | 2.02    | 1.22             | 1.91  | 2.27  | 5.00   | 1.78  | 1.00          | 1.67  | 1.00  | 2.37  | 1.63  |
| CLUSTER-SIMPROF group                     |         | a                | a     | a     | b      | a     |               | a     | a     | a     | a     |
|                                           |         |                  |       |       |        |       |               |       |       |       |       |
| <i>Belief evaluation (-3 to +3)</i>       |         |                  |       |       |        |       |               |       |       |       |       |
| Increasing the number of bream            | 2.57    | 2.64             | 2.67  | 2.63  | 2.00   | 2.42  |               | 2.33  | 2.00  | 2.58  | 2.82  |
| More bream to catch                       | 2.58    | 2.45             | 2.58  | 2.67  | 3.00   | 2.44  | 2.00          | 2.33  | 2.00  | 2.52  | 2.80  |
| Too many Black Bream                      | 1.44    | 2.56             | 2.27  | 1.46  | 0.00   | 0.59  | -2.00         | 1.67  | 2.00  | 1.07  | 2.19  |
| Less bream surviving                      | -2.41   | -2.78            | -2.64 | -2.49 | -3.00  | -2.00 | -1.00         | -2.33 | -1.80 | -2.31 | -2.71 |
| Increasing fishing pressure               | -1.98   | -2.11            | -2.27 | -2.08 | -1.00  | -1.64 | -2.00         | -2.67 | -1.67 | -1.92 | -2.20 |
| CLUSTER-SIMPROF group                     |         | a                | a     | a     | b      | b     |               | a     | a     | a     | a     |
|                                           |         |                  |       |       |        |       |               |       |       |       |       |
| <i>Belief-based attitude (-18 to +18)</i> |         |                  |       |       |        |       |               |       |       |       |       |
| Increasing the number of bream            | 13.54   | 14.82            | 13.58 | 13.84 | 10.00  | 12.54 |               | 14.00 | 8.60  | 13.44 | 15.15 |
| More bream to catch                       | 13.28   | 14.00            | 12.42 | 13.94 | 12.00  | 12.04 | 0.00          | 11.00 | 10.40 | 12.72 | 15.40 |
| Too many Black Bream                      | 0.54    | 2.44             | 1.64  | 0.24  | 0.00   | -0.14 | 0.00          | 0.00  | 1.75  | -0.09 | 1.81  |
| Less bream surviving                      | -1.77   | -4.00            | -2.00 | -1.42 | -9.00  | -1.35 | 0.00          | 0.00  | -1.80 | -2.22 | -1.12 |
| Increasing fishing pressure               | -2.84   | -1.11            | -4.91 | -2.94 | -5.00  | -2.28 | -2.00         | -3.67 | -2.33 | -3.38 | -2.13 |
| CLUSTER-SIMPROF group                     |         | a                | a     | a     | b      | a     |               | a     | a     | a     | a     |



**Supplementary Table S15:** Percentage of recreational (a) Blue Swimmer Crab and (b) Black Bream fishers that agreed, disagreed or were unsure whether they would continue to fish if the population is stocked. Percentages are given for all fishers overall and for those fishers utilising a particular fishing location and those belonging to a fisher group. Cells shaded according to the magnitude of their values with those in dark red being the lowest and those in dark green the highest. The CLUSTER-SIMPROF groups assigned are given below. Fishing locations and fisher groups with the same letter indicate no significant difference in the percentage contribution across the possible answers, whereas those with different letters are deemed to be different.

| (a) Blue Swimmer Crabs |         | Fishing location |      |      |        |       | Fisher group |     |    |    |    |    |    |    |
|------------------------|---------|------------------|------|------|--------|-------|--------------|-----|----|----|----|----|----|----|
|                        | Overall |                  | Peel | Swan | Lesch. | Shark |              | a   | b  | c  | d  | e  | f  | g  |
| Agree                  | 88      |                  | 88   | 87   | 89     | 83    |              | 100 | 86 | 89 | 82 | 80 | 92 | 50 |
| Unsure                 | 10      |                  | 9    | 9    | 4      | 17    |              | 0   | 11 | 9  | 12 | 0  | 1  | 33 |
| Disagree               | 3       |                  | 3    | 4    | 7      | 0     |              | 0   | 4  | 2  | 6  | 20 | 7  | 17 |
| CLUSTER-SIMPROF group  |         |                  | a    | a    | a      | b     |              | a   | a  | a  | a  | a  | a  | b  |

| (b) Black Bream       |         |  | Fishing location |      |      |        |       |  | Fisher group |     |    |    |     |
|-----------------------|---------|--|------------------|------|------|--------|-------|--|--------------|-----|----|----|-----|
|                       | Overall |  | Black.           | Peel | Swan | Wilson | Other |  | a            | b   | c  | d  | e   |
| Agree                 | 96      |  | 92               | 93   | 97   | 100    | 97    |  | 100          | 100 | 83 | 95 | 100 |
| Unsure                | 3       |  | 8                | 7    | 2    | 0      | 3     |  | 0            | 0   | 0  | 3  | 0   |
| Disagree              | 2       |  | 0                | 0    | 2    | 0      | 0     |  | 0            | 0   | 17 | 2  | 0   |
| CLUSTER-SIMPROF group |         |  | a                | a    | a    |        | a     |  |              | a   | a  | a  |     |

**Supplementary Table S16:** Percentage of recreational Blue Swimmer Crab fishers that chose options related to what they would do if they caught a hatchery-reared crab. Percentages are given for all fishers overall and for those fishers utilising a particular fishing location and those belonging to a fisher group. Cells shaded according to the magnitude of their values with those in dark red being the lowest and those in dark green the highest. The CLUSTER-SIMPROF groups assigned are given below. Fishing locations and fisher groups with the same letter indicate no significant difference in the percentage contribution across the possible answers, whereas those with different letters are deemed to be different.

| Blue Swimmer Crabs                                             |         |  | Fishing location |      |        |       |  | Fisher group |    |    |    |    |    |    |
|----------------------------------------------------------------|---------|--|------------------|------|--------|-------|--|--------------|----|----|----|----|----|----|
|                                                                | Overall |  | Peel             | Swan | Lesch. | Shark |  | a            | b  | c  | d  | e  | f  | g  |
| I would eat it as if it was wild crab                          |         |  |                  |      |        |       |  |              |    |    |    |    |    |    |
| Agree                                                          | 84      |  | 81               | 89   | 95     | 83    |  | 80           | 88 | 87 | 78 | 70 | 81 | 83 |
| Don't know                                                     | 13      |  | 15               | 9    | 5      | 0     |  | 0            | 11 | 12 | 16 | 30 | 16 | 0  |
| Disagree                                                       | 3       |  | 3                | 2    | 0      | 17    |  | 20           | 2  | 1  | 6  | 0  | 3  | 17 |
| CLUSTER-SIMPROF group                                          |         |  | a                | a    | a      | a     |  | a            | b  | b  | b  | b  | b  | a  |
| I would eat it but would prefer wild crab                      |         |  |                  |      |        |       |  |              |    |    |    |    |    |    |
| Agree                                                          | 28      |  | 28               | 27   | 29     | 0     |  | 60           | 26 | 25 | 27 | 60 | 29 | 17 |
| Don't know                                                     | 41      |  | 43               | 41   | 43     | 50    |  | 30           | 28 | 46 | 41 | 10 | 40 | 33 |
| Disagree                                                       | 32      |  | 29               | 32   | 29     | 50    |  | 10           | 46 | 29 | 33 | 30 | 31 | 50 |
| CLUSTER-SIMPROF group                                          |         |  | a                | a    | a      | b     |  | a            | c  | b  | b  | a  | b  | c  |
| I would not eat it myself but would keep it for family/friends |         |  |                  |      |        |       |  |              |    |    |    |    |    |    |
| Agree                                                          | 4       |  | 4                | 5    | 5      | 0     |  | 0            | 0  | 3  | 4  | 10 | 9  | 0  |
| Don't know                                                     | 20      |  | 22               | 19   | 14     | 0     |  | 0            | 14 | 16 | 22 | 30 | 33 | 20 |
| Disagree                                                       | 75      |  | 74               | 77   | 81     | 100   |  | 100          | 86 | 81 | 73 | 60 | 57 | 80 |
| CLUSTER-SIMPROF group                                          |         |  | a                | a    | b      | b     |  | a            | b  | b  | b  | c  | c  | b  |
| I would release after capture, I don't like aquacultured crabs |         |  |                  |      |        |       |  |              |    |    |    |    |    |    |
| Agree                                                          | 3       |  | 4                | 2    | 0      | 0     |  | 20           | 4  | 1  | 2  | 0  | 5  | 0  |
| Don't know                                                     | 33      |  | 35               | 25   | 29     | 0     |  | 20           | 21 | 29 | 45 | 60 | 44 | 20 |
| Disagree                                                       | 64      |  | 61               | 73   | 71     | 100   |  | 60           | 75 | 70 | 53 | 40 | 51 | 80 |
| CLUSTER-SIMPROF group                                          |         |  | a                | a    | a      | b     |  | a            | a  | a  | b  | b  | b  | a  |
